# Supplementary material for: Non-Enzymatic DNA Cleavage Reaction Induced by 5-Ethynyluracil in Methylamine Aqueous Solution and Application to DNA Concatenation
Source: PLOS journal article supplement (doi:10.1371/journal.pone.0092369), 2014-03-19
Supplement: S7 (10.1371/journal.pone.0092369.s007) [file journal.pone.0092369.s007]

## Data S1

### MALDI TOF mass data of cleavage products

Products from T<sub>6</sub>(EU)T<sub>6</sub>; pT<sub>6</sub> (P1), calcd C<sub>60</sub>H<sub>79</sub>N<sub>12</sub>O<sub>43</sub>P<sub>6</sub> 1842.2 [M-H]<sup>-</sup>; found 1841.8; T<sub>6</sub>pR (P2), calcd C<sub>66</sub>H<sub>90</sub>N<sub>13</sub>O<sub>45</sub>P<sub>6</sub> 1971.3 [M-H]<sup>-</sup>; found 1971.3; Product from (EU)T<sub>2</sub>AT<sub>2</sub>GT<sub>2</sub>; pT<sub>2</sub>AT<sub>2</sub>GT<sub>2</sub> (P1), calcd for C<sub>80</sub>H<sub>103</sub>N<sub>22</sub>O<sub>54</sub>P<sub>8</sub> 2484.6 [M-H]<sup>-</sup>; found 2484.6; Product from T<sub>2</sub>AT<sub>2</sub>GT<sub>2</sub>(EU)T; T<sub>2</sub>AT<sub>2</sub>GT<sub>2</sub>pR (P2), calcd for C<sub>86</sub>H<sub>114</sub>N<sub>23</sub>O<sub>56</sub>P<sub>8</sub> 2613.7 [M-H]<sup>-</sup>; found 2613.8; Products from T<sub>5</sub>A(EU)AT<sub>5</sub>; pAT<sub>5</sub> (P1), calcd C<sub>60</sub>H<sub>78</sub>N<sub>15</sub>O<sub>41</sub>P<sub>6</sub> 1851.2 [M-H]<sup>-</sup>; found 1850.9; T<sub>5</sub>ApR (P2), calcd C<sub>66</sub>H<sub>89</sub>N<sub>16</sub>O<sub>43</sub>P<sub>6</sub> 1980.3 [M-H]<sup>-</sup>; found 1980.2; Products from T<sub>5</sub>C(EU)CT<sub>5</sub>; pCT<sub>5</sub> (P1), calcd C<sub>59</sub>H<sub>78</sub>N<sub>13</sub>O<sub>42</sub>P<sub>6</sub> 1827.2 [M-H]<sup>-</sup>; found 1827.0; T<sub>5</sub>CpR (P2), calcd C<sub>65</sub>H<sub>89</sub>N<sub>14</sub>O<sub>44</sub>P<sub>6</sub> 1956.3 [M-H]<sup>-</sup>; found 1956.3; Products from T<sub>5</sub>G(EU)GT<sub>5</sub>; pGT<sub>5</sub> (P1), calcd C<sub>60</sub>H<sub>78</sub>N<sub>15</sub>O<sub>42</sub>P<sub>6</sub> 1867.2 [M-H]<sup>-</sup>; found 1867.2; T<sub>5</sub>GpR (P2), calcd C<sub>66</sub>H<sub>89</sub>N<sub>16</sub>O<sub>44</sub>P<sub>6</sub> 1996.3 [M-H]<sup>-</sup>; found 1996.2; Products from CGCA<sub>2</sub>T(EU)TA<sub>2</sub>CGC; pTA<sub>2</sub>CGC (P1), calcd C<sub>58</sub>H<sub>74</sub>N<sub>23</sub>O<sub>36</sub>P<sub>6</sub> 1855.2 [M-H]<sup>-</sup>; found 1855.0; CGCA<sub>2</sub>TpR (P2), calcd C<sub>64</sub>H<sub>85</sub>N<sub>24</sub>O<sub>38</sub>P<sub>6</sub> 1984.3 [M-H]<sup>-</sup>; found 1984.3. R (C<sub>6</sub>H<sub>11</sub>NO<sub>2</sub>) was calculated on the supposition that the cleavage reaction was accompanied by elimination of EU and addition of methylamine and OH<sup>-</sup>.
